# Supplementary material
Source: PubMed Central journal article supplement (PMC5328804)

Supplementary Figure S1

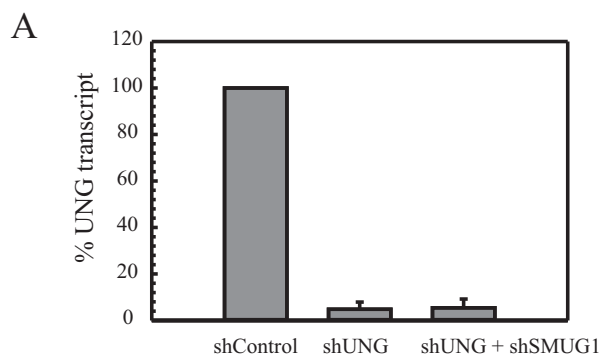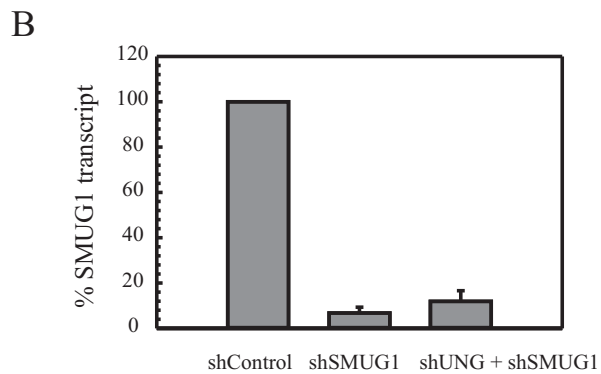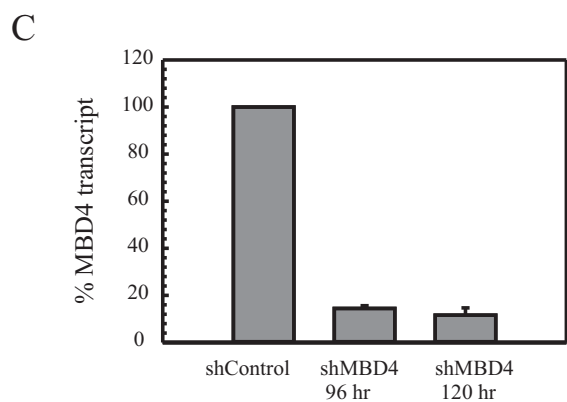

**D** *In vitro* glycosylase assay with MEFs for Undamaged DNA and ICL uracil substrate

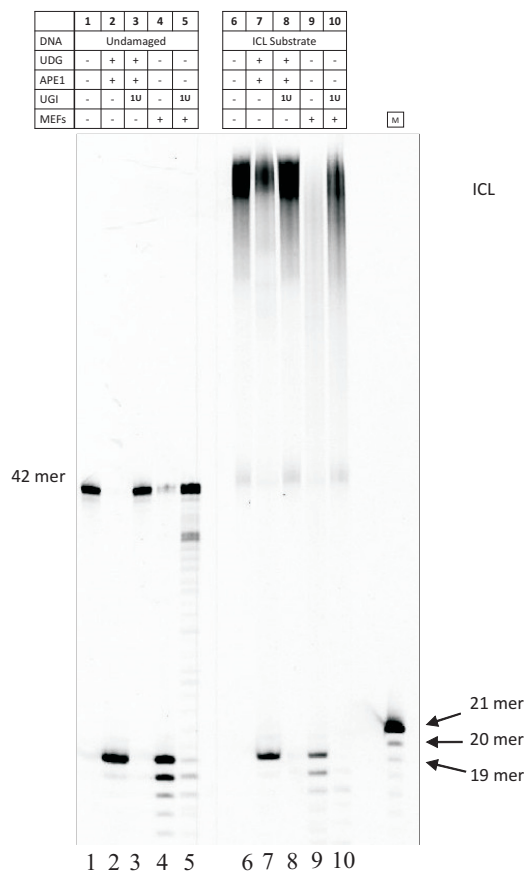

**E** *In vitro* glycosylase assay with UNG<sup>-/-</sup> MEFs for Undamaged DNA and ICL uracil substrate

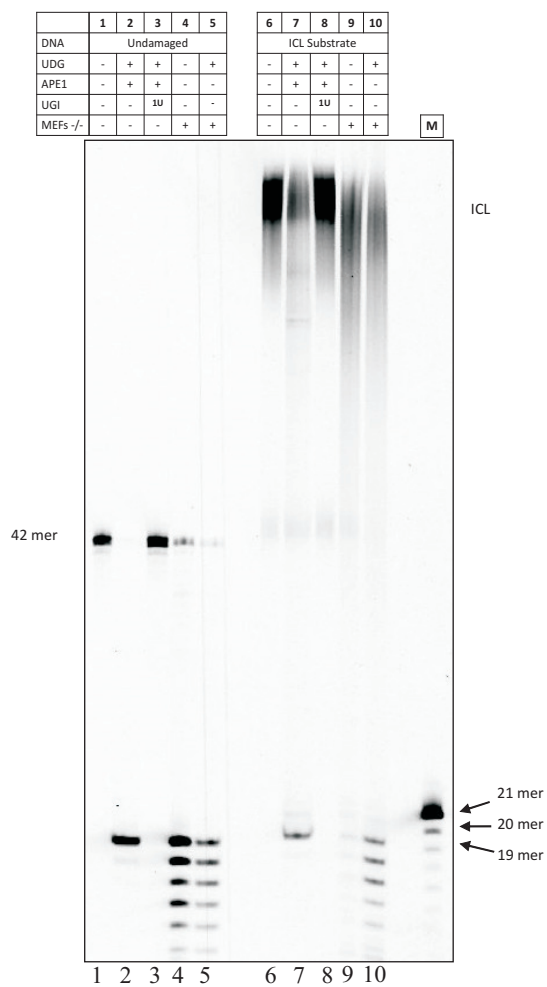

Supplementary Figure S2

A

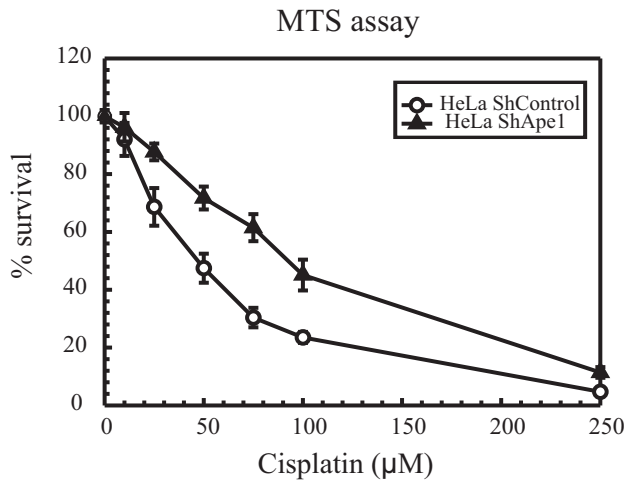

B

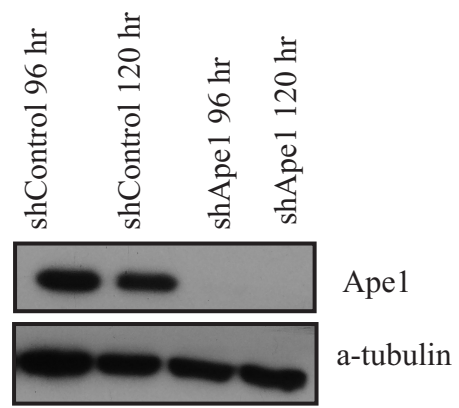

C

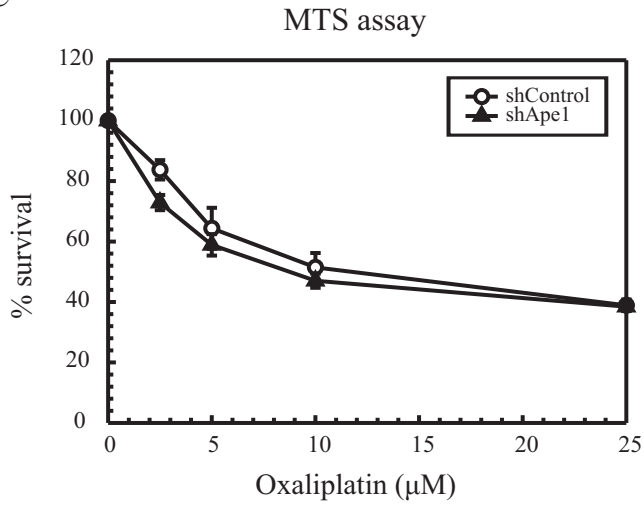

Supplementary Figure S3

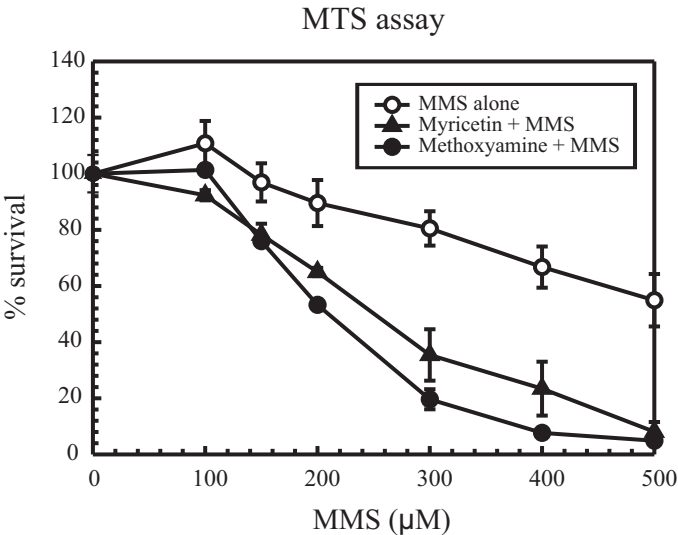

Supplementary Figure S4

A

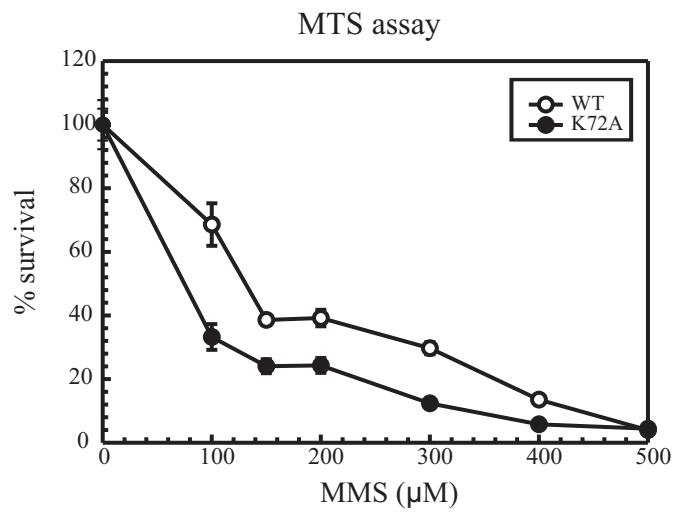

B

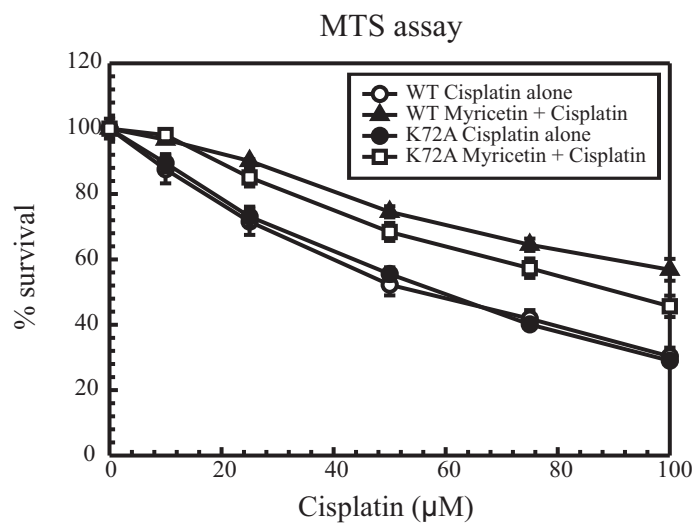

# Supplementary Figure S5

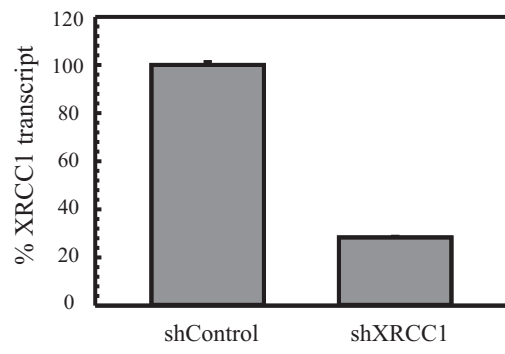

Supplement: NIHMS844487-supplement-1.pdf [file NIHMS844487-supplement-1.pdf]
